# Supplementary material
Source: MDPI journal article supplement (https://www.mdpi.com/1424-8247/14/5/402)
Supplement: s1 [file s1]

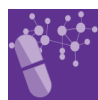

## Article

# Preliminary biological activity screening of *Plectranthus* spp. extracts for the search of anticancer lead molecules

## Supporting Information

**Figure S1:**  $^1\text{H}$ -NMR data information for  $7\alpha$ -acetoxy- $6\beta$ -hydroxyroyleanone isolated from *P. hadiensis*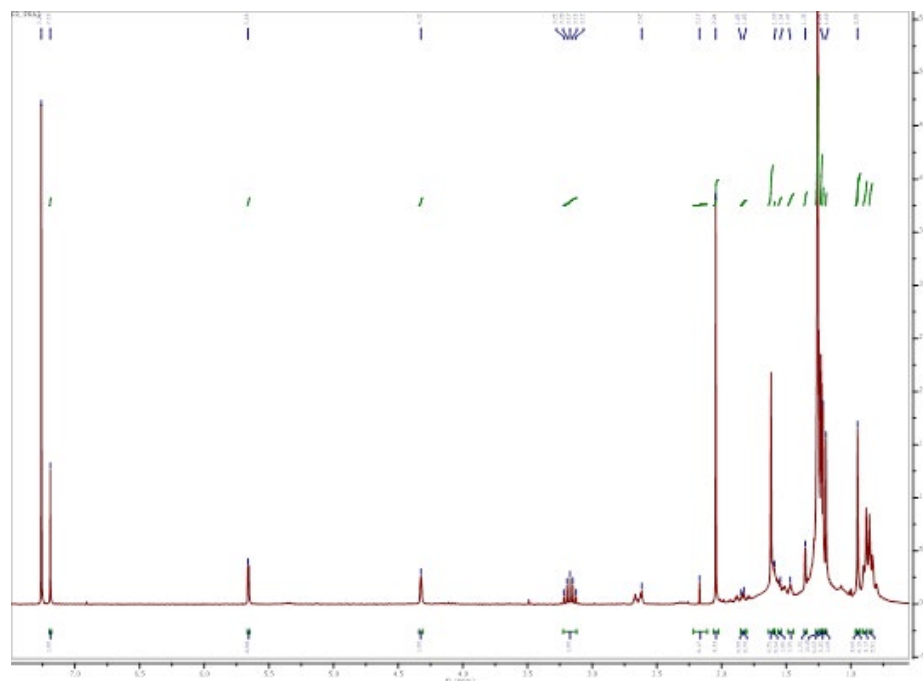**Table S1:** NMR spectroscopy data characterization,  $^1\text{H}$  NMR (300 MHz,  $\text{CDCl}_3$ ),  $^{13}\text{C}$  (75 MHz,  $\text{CDCl}_3$ )

| Position | $\delta_c$ types | $\delta_H$ (J =Hz)                                         | HMBC    |
|----------|------------------|------------------------------------------------------------|---------|
| 1        | 38.46            | 2.62, m (2.6)                                              | 3       |
| 2        | 21.69            | 1.83 $2\beta$ , dd (13.5, 3.7)<br>1.54 $2\alpha$ , d (3.6) |         |
| 3        | 42.43            | 1.47, d (1.3)                                              | 1, 2, 4 |
| 4        | 33.84            |                                                            |         |
| 5        | 49.92            | 1.35, s                                                    | 3       |
| 6        | 67.07            | 4.32, 6-H, d(1.7)<br>2.17, 6-OH, s                         | 5, 7, 8 |
| 7        | 68.89            | 5.66, d (2.1)                                              | 6, 5    |
| 8        | 136.99           |                                                            |         |
| 9        | 150.04           |                                                            |         |

|                               |        |                  |                               |
|-------------------------------|--------|------------------|-------------------------------|
| 10                            | 38.85  |                  |                               |
| 11                            | 182.99 |                  |                               |
| 12                            | 150.05 | 7.19, s          | 11, 13                        |
| 13                            | 124.76 |                  |                               |
| 14                            | 185.89 |                  |                               |
| 15                            | 24.35  | 3.17, sept (7.5) | 13, 14, 16, 17                |
| 16                            | 20.01  | 1.20, d (7.1)    |                               |
| 17                            | 19.88  | 1.19, d (7.1)    |                               |
| 18                            | 33.78  | 0.95, s          | 3                             |
| 19                            | 23.85  | 1.2, s           |                               |
| 20                            | 21.54  | 1.59, s          | 11                            |
| 7 $\alpha$ -COCH <sub>3</sub> | 169.70 |                  |                               |
| 7 $\alpha$ -COCH <sub>3</sub> | 21.06  | 2.04, s          | 7 $\alpha$ -COCH <sub>3</sub> |

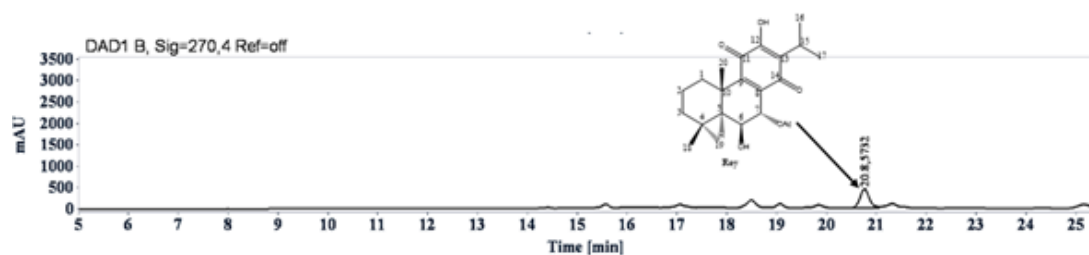

**Figure S2:** HPLC representative chromatograms (270 nm) of *P. hadiensis* leaves showing the major compound, 7 $\alpha$ -Acetoxy-6 $\beta$ -hydroxyroyleanone

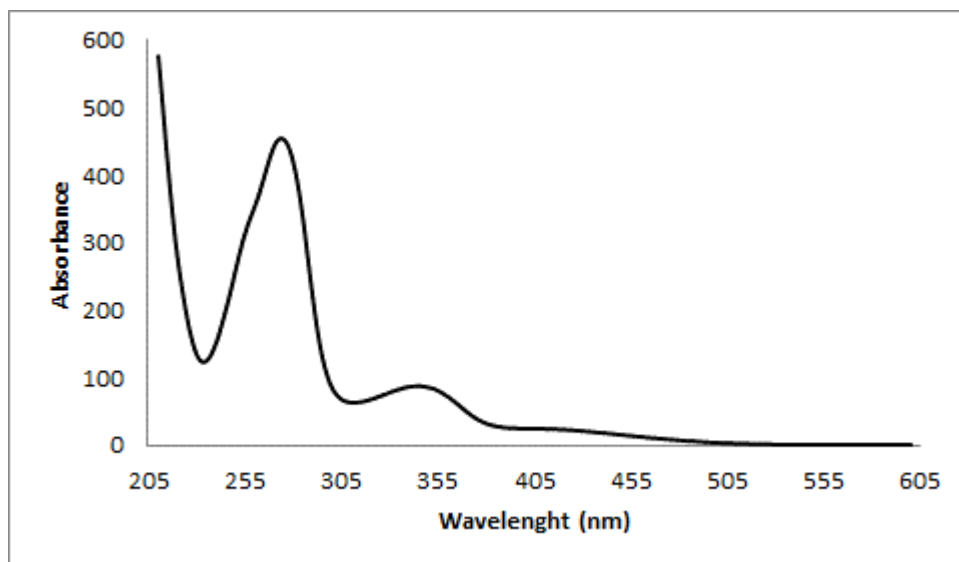

**Figure S3:** UV spectrum of 7 $\alpha$ -Acetoxy-6 $\beta$ -hydroxyroyleanone

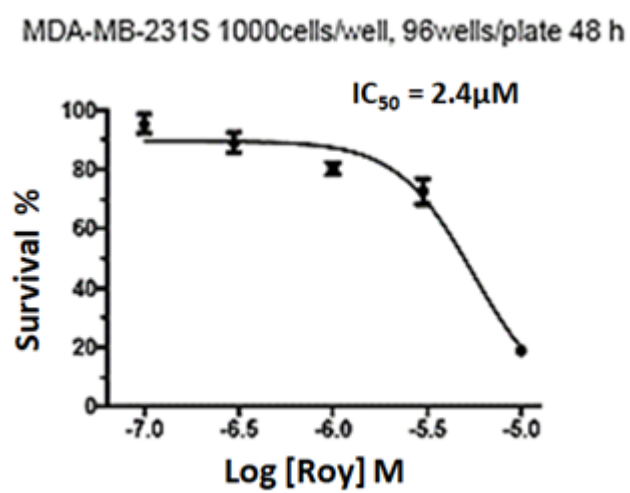

**Figure S4:** Concentration-response curves ( $IC_{50}$   $\mu M$ ) for Roy
